# Supplementary material for: VGLL3 is a mechanosensitive protein that promotes cardiac fibrosis through liquid–liquid phase separation
Source: PubMed Central journal article supplement (PMC9908974; doi:10.1038/s41467-023-36189-6), 2023-02-08

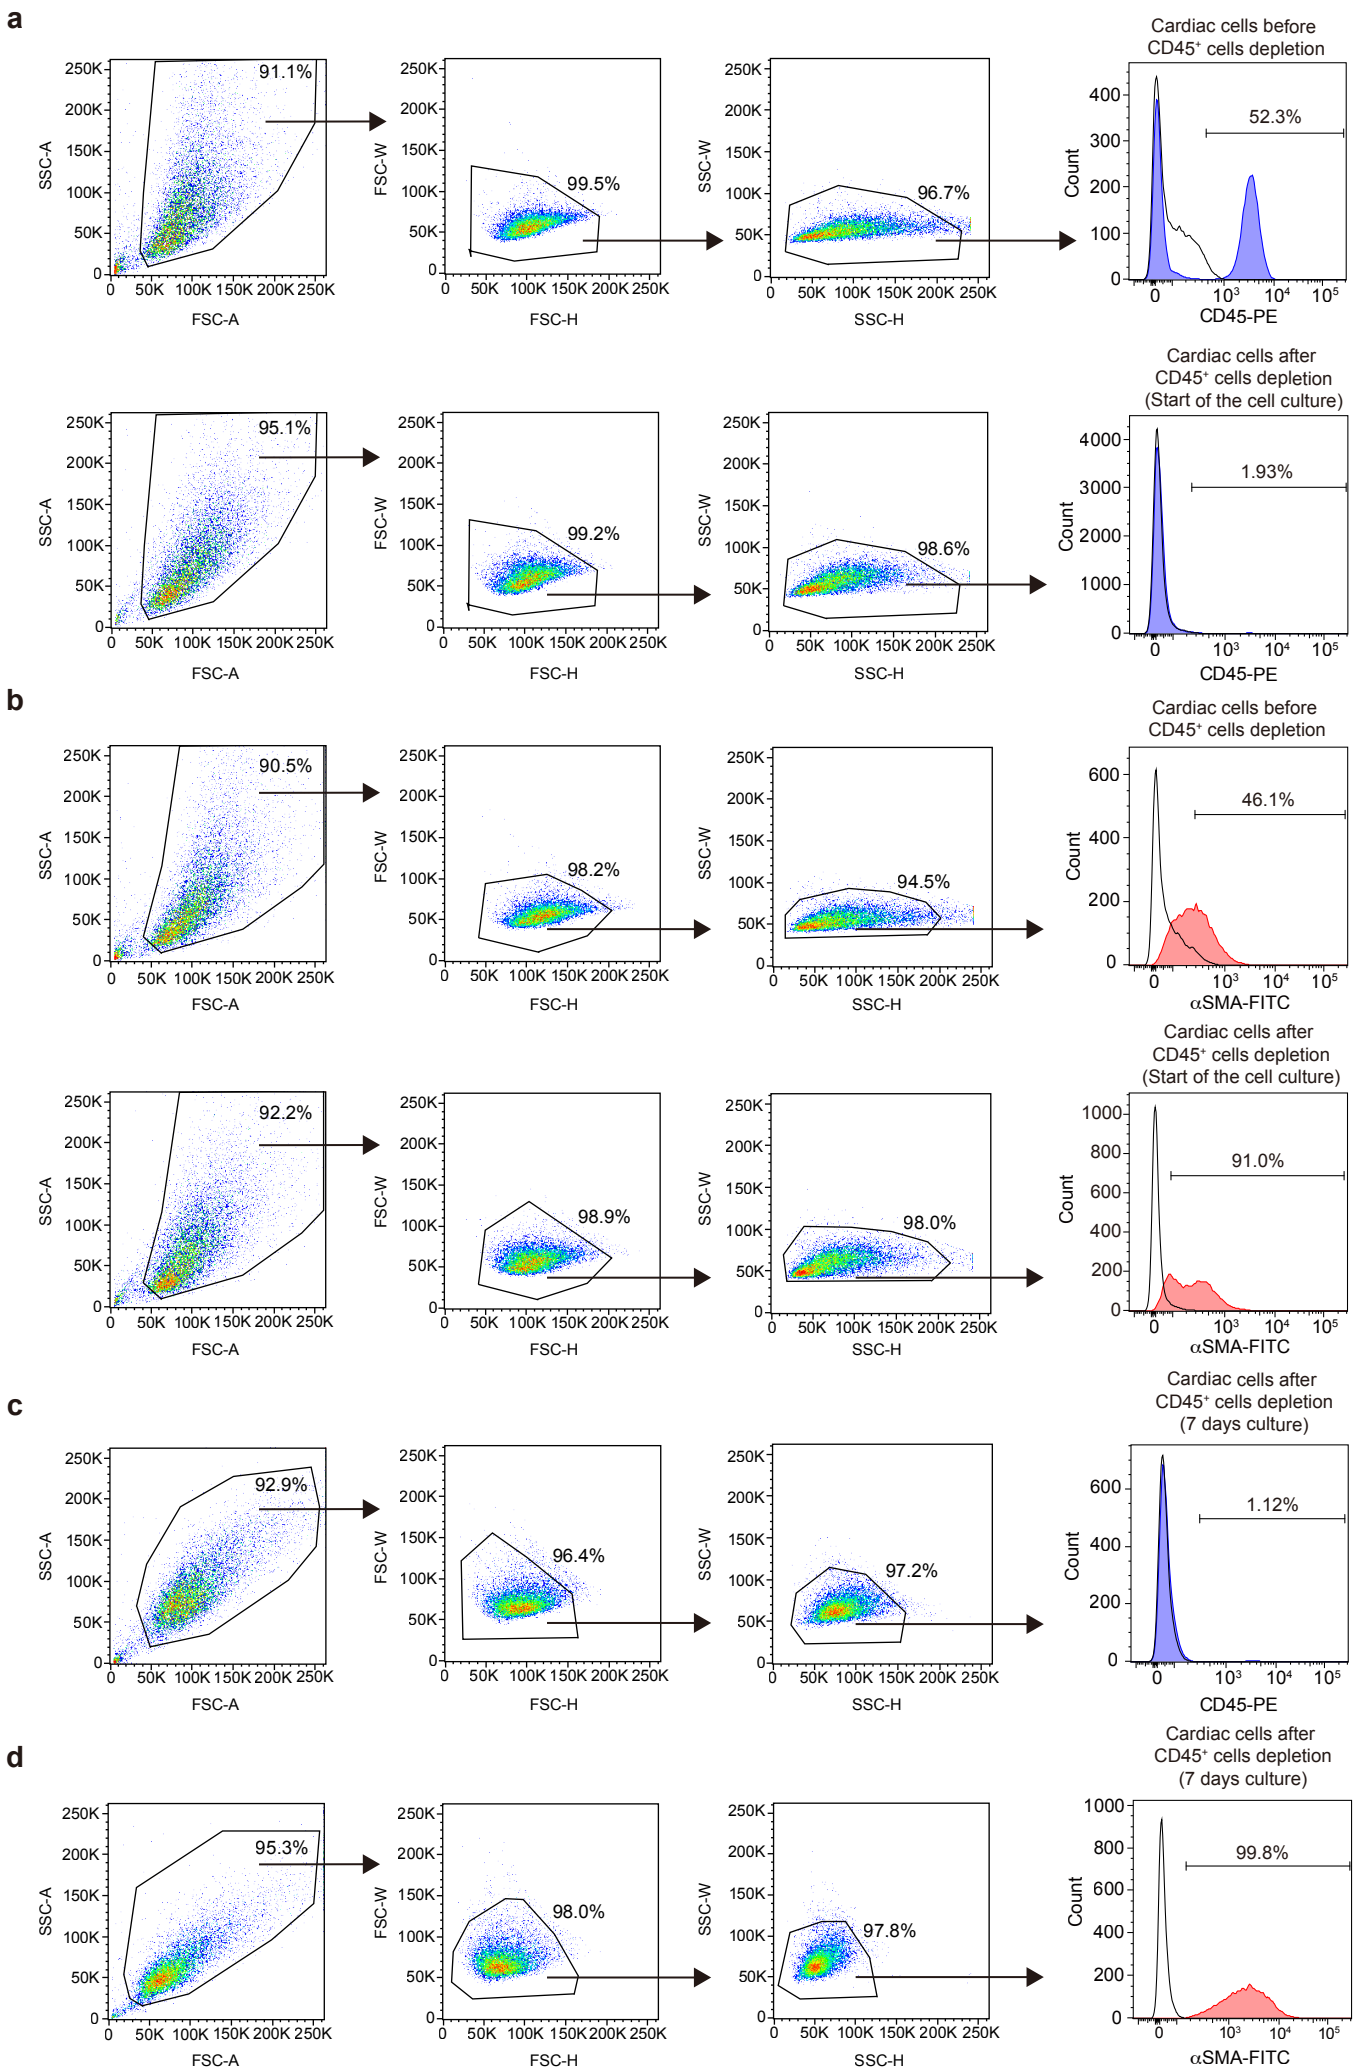

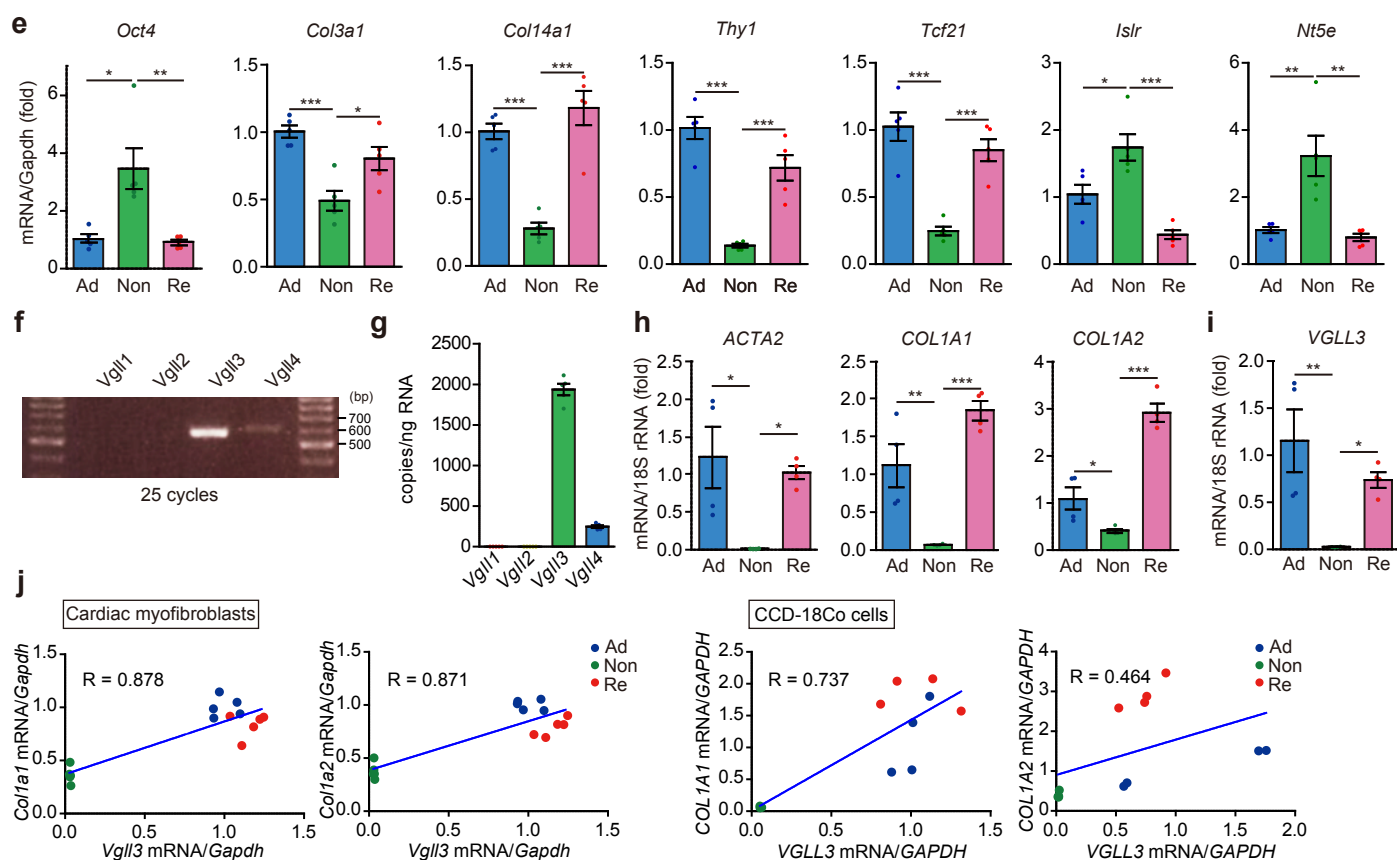

**Supplementary Fig. 1 Purification of cardiac myofibroblasts and mRNA expression of stem cell marker, fibroblast markers, mesenchymal stem cell markers, and *Vgll* family members in cardiac myofibroblasts.**

**a-d** Flow cytometry profiles of cardiac cells isolated from the myocardial infarction (MI) model mice on day 3 before and after CD45-positive cell depletion using magnetic-activated cell sorting (MACS). Before depletion, the cardiac cell fraction contained 52.3% of CD45-positive hematopoietic cells (**a**, upper panels) and 46.1% of  $\alpha$ SMA-positive myofibroblasts (**b**, upper panels). After CD45-positive cell depletion by MACS, few CD45-positive hematopoietic cells were detected in the cardiac cell fraction (**a**, lower panels), and almost all cells were  $\alpha$ SMA-positive myofibroblasts (91.0%) (**b**, lower panels). When the cardiac cell fraction after removal of CD45-positive cells was cultured for 7 days, CD45-positive hematopoietic cells were hardly detected in the cell fraction (**c**), which contained  $\alpha$ SMA-positive myofibroblasts with high purity (99.8%) (**d**). Histograms filled with blue or red represent cardiac cells stained with PE-conjugated anti-CD45 antibody or FITC-conjugated anti- $\alpha$ SMA antibody, respectively. Unfilled histograms represent the unstained control.

**e** *Oct4*, *Col3a1*, *Col14a1*, *Thy1*, *Tcf21*, *Islr*, and *Nt5e* mRNA levels in Adherent (Ad), Non-adherent (Non), and Re-adherent (Re) cardiac myofibroblasts ( $n = 5$  each). **f** PCR analysis for the mRNA expression of Vgll family (*Vgll1*, *Vgll2*, *Vgll3*, and *Vgll4*) in cardiac myofibroblasts. **g** Absolute quantification of *Vgll1*, *Vgll2*, *Vgll3*, and *Vgll4* expression in cardiac myofibroblasts by qRT-PCR ( $n = 5$  each). **h**, **i** *ACTA2*, *COL1A1*, *COL1A2*, and *VGLL3* mRNA levels in Ad, Non, and Re CCD-18Co cells ( $n = 4$  each). **j** Scatter plots for the correlation between *Vgll3* mRNA expression and expression of *Col1a1* and *Col1a2* in cardiac myofibroblasts or CCD-18Co cells cultured in Ad, Non, and Re. R represents the correlation coefficient. All the experiments were conducted at least three times. Data in **e**, **g**, **h**, and **i** are shown as the mean  $\pm$  SEM. *P*-values were determined using the Kruskal–Wallis followed by Dunn’s test in **e** (*Oct4*), one-way ANOVA followed by Tukey’s range test in **e** (*Col3a1*, *Col14a1*, *Thy1*, *Tcf21*, *Islr*, and *Nt5e*), **h**, and **i**,  $*P < 0.05$ ,  $**P < 0.01$ ,  $***P < 0.001$ .

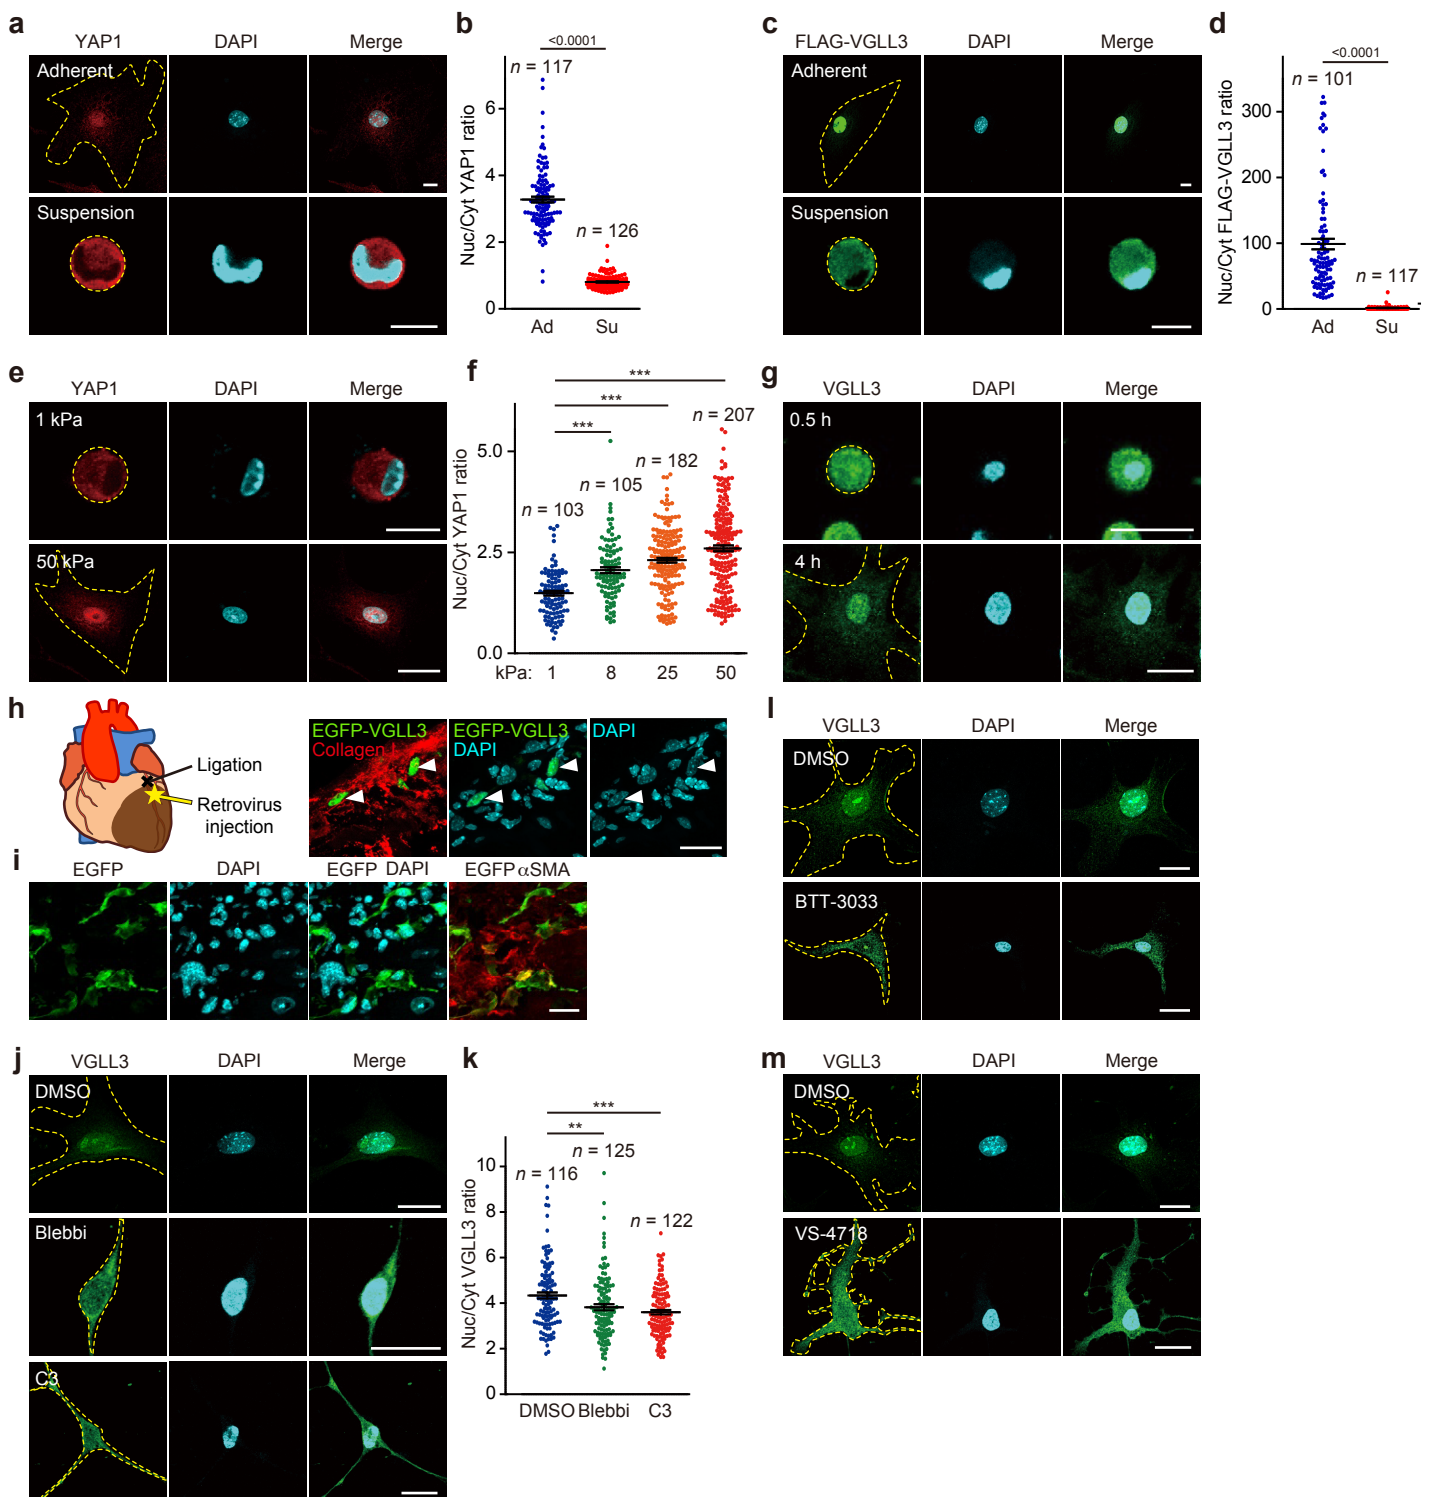

**Supplementary Fig. 2 Nuclear translocation of YAP1 induced by substrate stiffness in cardiac myofibroblasts and the effects of blebbistatin and C3 transferase on VGLL3 nuclear translocation.**

**a** Micrographs of myofibroblasts stained with anti-YAP1 antibody in adherent or suspension culture. **b** Ratios of nuclear to cytoplasmic YAP1 intensities in myofibroblasts in adherent (Ad) culture or in suspension (Su) culture. **c** Micrographs of myofibroblasts overexpressing FLAG-VGLL3 in adherent or suspension culture. **d** Ratios of nuclear to cytoplasmic FLAG-VGLL3 intensities in myofibroblasts in Ad culture or in Su culture. **e** Micrographs of myofibroblasts stained with anti-YAP1 antibody plated on soft (1 kPa) and stiff (50 kPa) hydrogels. **f** Ratios of nuclear to cytoplasmic YAP1 intensities in myofibroblasts plated on hydrogels with different stiffness. **g** Micrographs of myofibroblasts stained with anti-VGLL3 antibody adhered for the indicated times to glass-bottom dishes coated with poly-L-lysine. **h, i** Schematic representation of the site of intramyocardial injection. The retrovirus encoding EGFP or EGFP-VGLL3 was administered directly below the ligation site (left image of **h**). Nuclear localization of EGFP-VGLL3 in cardiac myofibroblasts around Collagen I deposition in the left ventricle of mouse hearts 3 days after MI (Right micrographs of **h**). White arrowheads in merged images indicated representative signals for EGFP-VGLL3 located in nuclei of myofibroblasts. In contrast, EGFP alone was distributed in cytoplasm of cardiac myofibroblasts (**i**). **j** Micrographs of myofibroblasts treated with DMSO (0.5%), blebbistatin (Blebbi, 50  $\mu$ M), and C3 transferase (C3, 3  $\mu$ g/mL). **k** Ratios of nuclear to cytoplasmic VGLL3 intensities in myofibroblasts treated with the cytoskeletal inhibitors as described in **j**. **l** Micrographs of myofibroblasts treated with DMSO (0.5%) and BTT-3033 (30  $\mu$ M). **m** Micrographs of myofibroblasts treated with DMSO (0.5%) and VS-4718 (50  $\mu$ M). Data are shown as the mean  $\pm$  SEM.  $P$ -values were determined using the two-sided Mann-Whitney's  $U$  test in **b** and **d**, Kruskal-Wallis followed by Dunn's test in **f** and **k**,  $***P < 0.001$ . Confocal micrographs of YAP1, FLAG-VGLL3, VGLL3 and nuclei in cardiac myofibroblasts are representative of at least three biological replicates. Scale bars in **a**, **c**, **e**, **g**, **h-j**, **l** and **m** = 20  $\mu$ m.

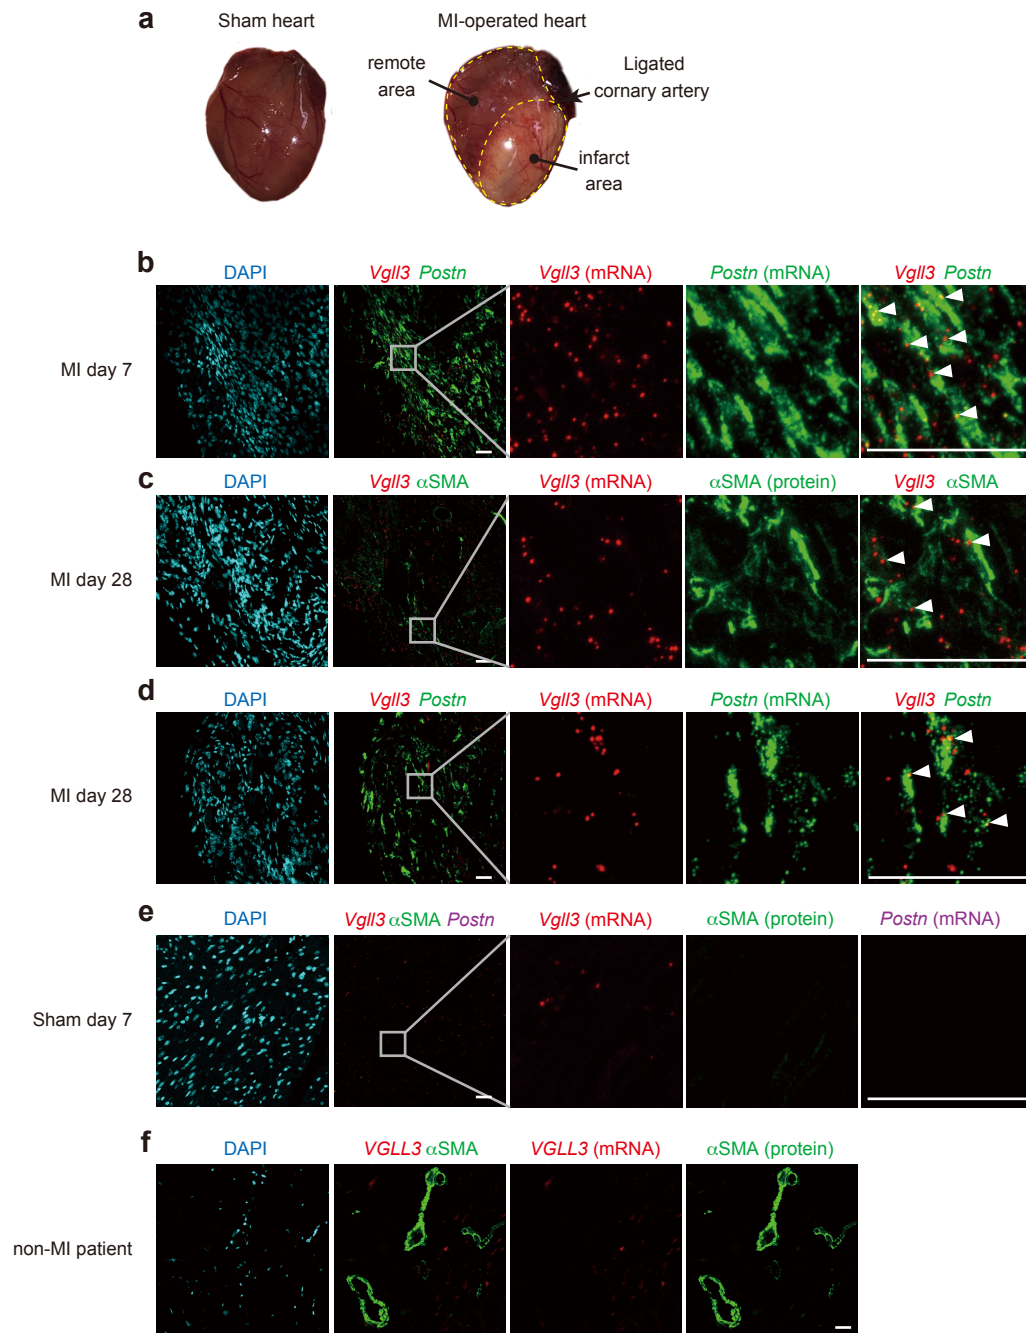

**Supplementary Fig. 3 *Vgll3* is specifically expressed in myofibroblasts from fibrotic hearts.**

**a** Determination of the infarct or remote area in a mouse heart, 3 days after MI. **b–f** Representative images of in situ hybridisation of *Vgll3* mRNA in the left ventricle of MI murine heart on day 7 (**b**), day 28 (**c**, **d**), sham murine heart on day 7 (**e**) and the heart of a non-MI patient (**f**). Co-in situ hybridisation of *Vgll3* and *Postn* was performed on heart sections (**b**, **d**, **e**). Heart sections were co-stained with  $\alpha$ SMA (**c**, **e**, **f**). All experiments were conducted at least three times. Scale bars in **b–f** = 30  $\mu$ m. Grey squares in **b–e** indicate areas magnified in the right panels. White arrowheads in merged images (**b–d**) indicate the representative signals for *Vgll3* mRNA in myofibroblasts.



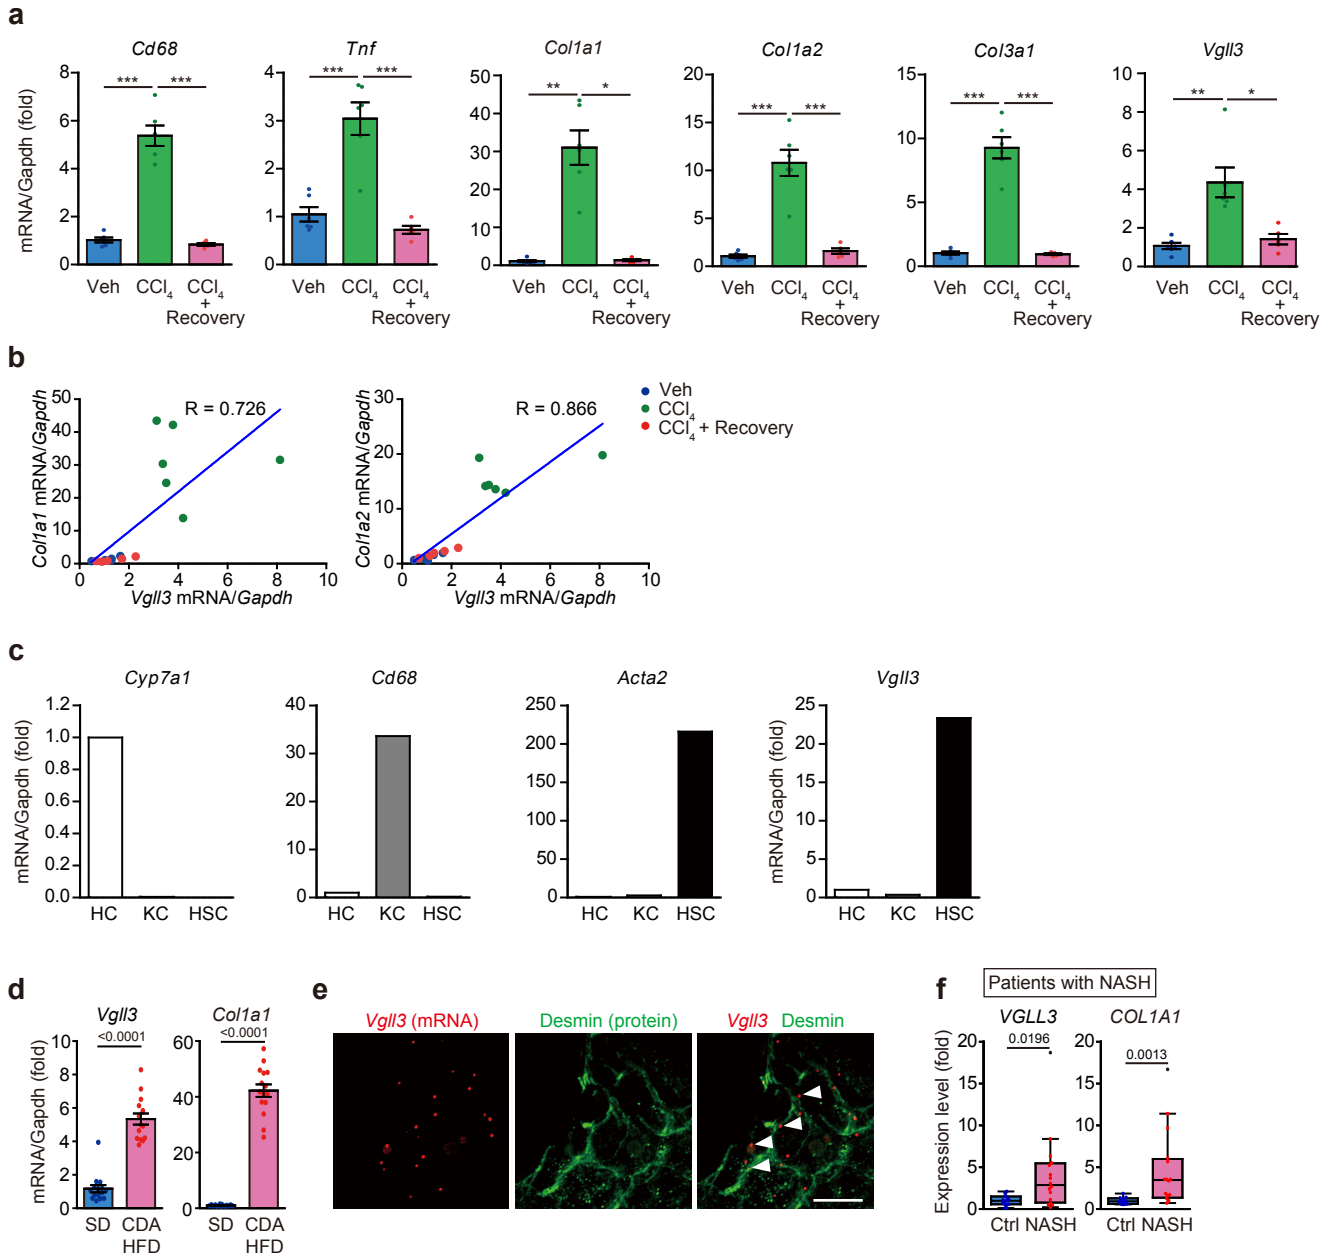

**Supplementary Fig. 4 Vgll3 is induced in fibrotic liver and is specifically expressed in hepatic stellate cells.**

**a** *Cd68*, *Tnf*, *Col1a1*, *Col1a2*, *Col3a1*, and *Vgll3* mRNA levels in mouse liver after administration of the vehicle (Veh), CCl<sub>4</sub>, or CCl<sub>4</sub> followed by recovery for 4 weeks (CCl<sub>4</sub>+Recovery) ( $n = 6, 6,$  and  $5,$  respectively). **b** Scatter plots for the correlation between *Vgll3* mRNA expression and expression of *Col1a1* and *Col1a2* in mouse livers (Veh, CCl<sub>4</sub>, or CCl<sub>4</sub>+Recovery). R represents the correlation coefficient. **c** mRNA levels of the hepatocyte marker (*Cyp7a1*), the Kupffer cell marker (*Cd68*), and the hepatic stellate cell marker (*Acta2*) in cell fractions of hepatocytes (HC), Kupffer cells (KC), and hepatic stellate cells (HSC) isolated from the liver of a CCl<sub>4</sub>-administered mouse. **d** mRNA expression of *Vgll3* in HC, KC, and HSC. Results are expressed as fold changes relative to Veh (**a**) or HC (**c**) data. **d** *Vgll3* and *Col1a1* mRNA levels in the liver of mice fed a standard diet (SD) or choline-deficient, L-amino acid-defined, high-fat diet (CDAHFD) ( $n = 15$  each). **e** Co-detection of *Vgll3* mRNA and desmin in the liver of non-alcoholic steatohepatitis (NASH) model mice. **f** *VGLL3* and *COL1A1* mRNA levels in the livers of control individuals ( $n = 14$ ) and patients with NASH ( $n = 16$ ) based on data from GSE126848. Data in **f** are presented as box and whisker plots (Tukey style, outliers in black dots). The box shows the 25th to 75th percentile range with the median value represented by a horizontal line. The whiskers stretch to the minimum and maximum values within 1.5 times the interquartile range from the 25th–75th percentiles. Data in **a**, **d** and **f** are presented as the mean  $\pm$  SEM. *P*-values were determined using one-way ANOVA followed by Tukey's range test in **a** (*Cd68*, *Tnf*, *Col1a2*, and *Col3a1*), the Kruskal–Wallis test followed by Dunn's test in **a** (*Col1a1* and *Vgll3*), the two-sided Student's *t*-test in **d**, and the two-sided Mann–Whitney's *U* test in **f**. \* $P < 0.05$ , \*\* $P < 0.01$ , \*\*\* $P < 0.001$ . *In situ* hybridisation data are representative of at least three independent experiments. White arrowheads in **e** indicate the representative signals for *Vgll3* mRNA. Scale bar in **e** = 10  $\mu$ m.

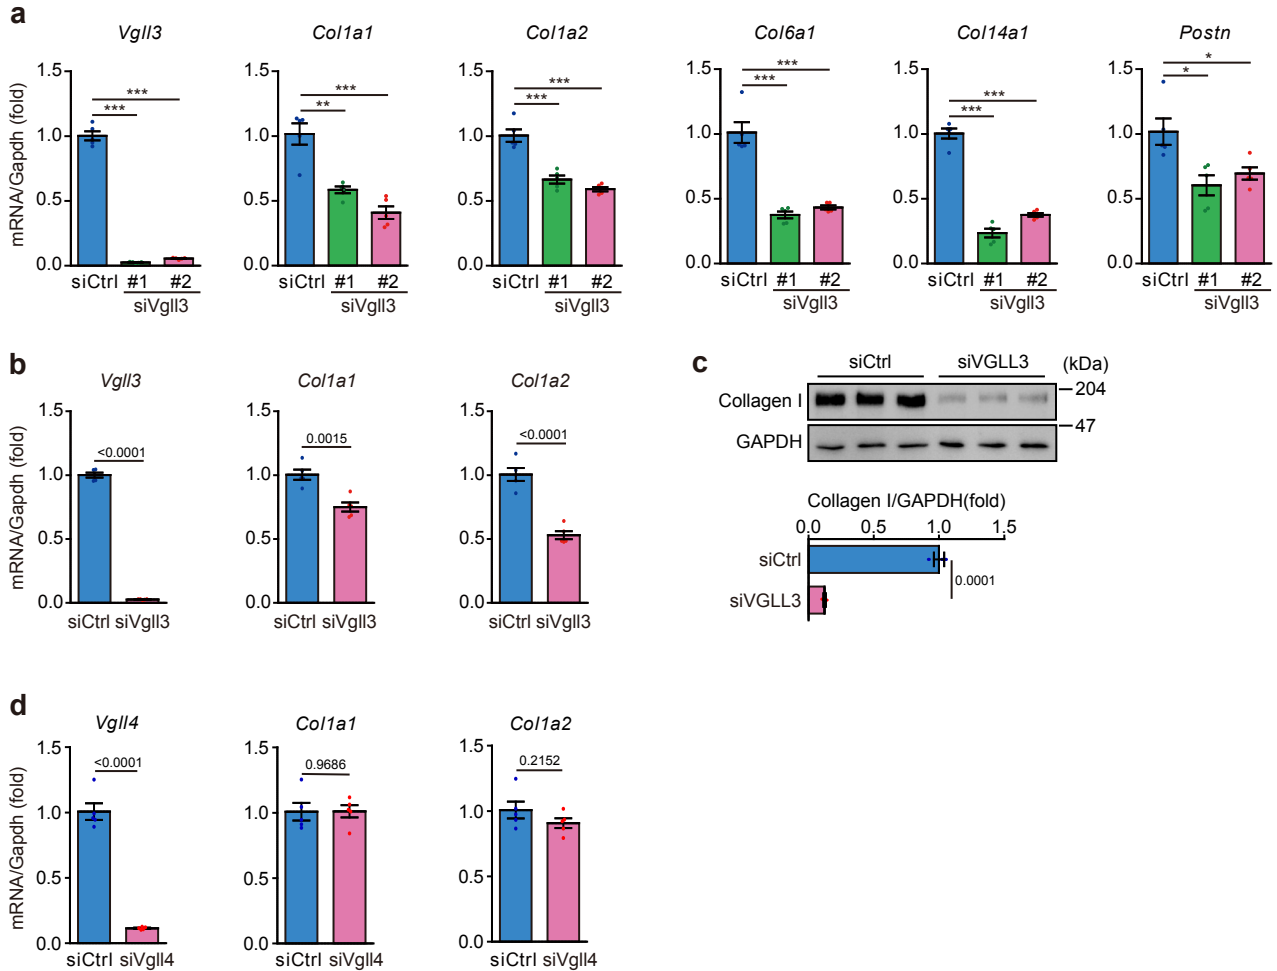

**Supplementary Fig. 5 Transfection with siRNA against *Vgll3* suppressed the expression of fibrosis-related genes in cardiac myofibroblasts and hepatic stellate cells.**

**a** mRNA levels of *Vgll3* and fibrosis-related genes in cardiac myofibroblasts transfected with different siRNAs targeting *Vgll3* (siVgll3 #1 and #2) ( $n = 5$  each). **b** mRNA levels of *Vgll3* and fibrosis-related genes in hepatic stellate cells isolated from CCl<sub>4</sub>-induced fibrotic mouse livers, transfected with siRNA (#1) targeting *Vgll3* (siVgll3) ( $n = 5$  each). **c** Protein levels of Collagen I and GAPDH in CCD-18Co transfected with siRNA (#1) targeting *Vgll3* (siVgll3) ( $n = 3$  each). **d** mRNA levels of *Vgll4* and fibrosis-related genes in cardiac myofibroblasts transfected with siRNA targeting *Vgll4* ( $n = 5$  each). All the experiments were performed at least three times. Data are presented as the mean  $\pm$  SEM.  $P$ -values were determined using one-way ANOVA followed by Tukey's range test in **a**, and two-sided Student's  $t$ -test in **b-d**, \* $P < 0.05$ , \*\* $P < 0.01$ , \*\*\* $P < 0.001$ . n.s.; not statistically significant.

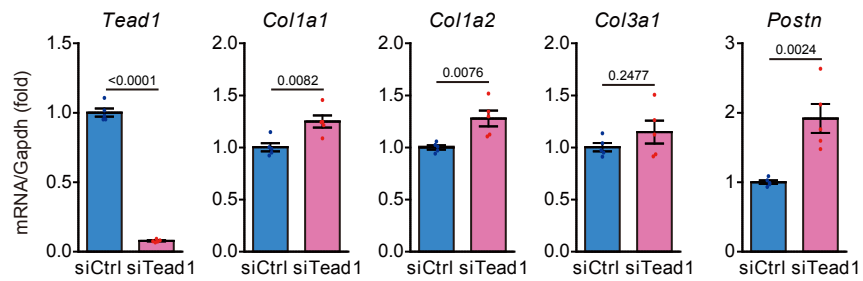

**Supplementary Fig. 6 Transfection with siRNA against *Tead1* did not suppress the expression of fibrosis-related genes in cardiac myofibroblasts.**

mRNA levels of fibrosis-related genes in cardiac myofibroblasts transfected with siRNA targeting *Tead1* ( $n = 5$  each). The experiments were performed at least three times. Data are shown as the mean  $\pm$  SEM. *P*-values were determined using the two-sided Student's *t*-test. n.s.; not statistically significant.

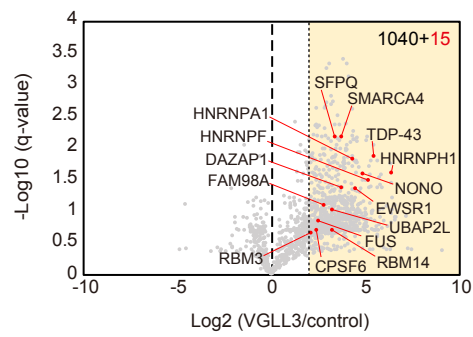

**Supplementary Fig. 7 Identification of fifteen paraspeckle proteins as VGLL3 interactors by mass spectrometry.**  
 Fifteen paraspeckle proteins are indicated in the volcano plot of Fig. 4a.



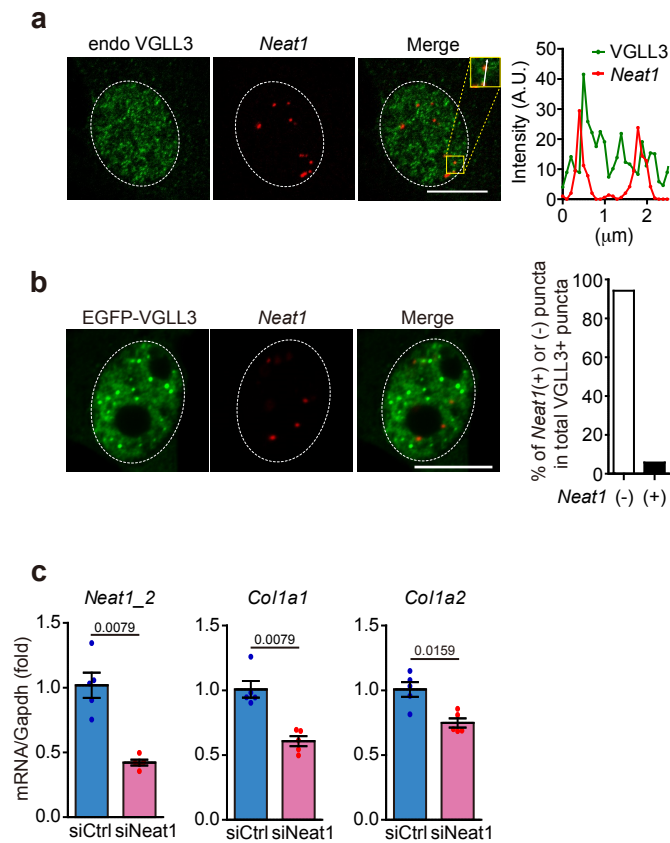

**Supplementary Fig. 8 Localisation of *Neat1* in cardiac myofibroblasts and its contribution to their collagen production.**

**a** Micrographs of endogenous VGLL3 puncta detected by immunostaining, and *Neat1* mRNA detected by RNA-FISH in cardiac myofibroblasts. The graph represents line scans along the white line in the yellow dashed square in the inset. **b** Micrographs of EGFP-VGLL3 puncta and *Neat1* mRNA detected by RNA-FISH in NIH3T3 cells. Percentage of *Neat1*-positive or *Neat1*-negative VGLL3 puncta in all VGLL3 puncta ( $n = 133$  puncta) is shown in the graph. **c** mRNA levels of *Neat1\_2* (long isoform of *Neat1*, essential for the assembly of paraspeckles), *Col1a1*, and *Col1a2* in cardiac myofibroblasts transfected with siRNA targeting *Neat1* ( $n = 5$  each). The experiments were performed at least three times. Data in **c** are shown as the mean  $\pm$  SEM. *P*-values were determined using the two-sided Mann–Whitney’s *U* test in **c**. Scale bars in **a** and **b** = 10  $\mu\text{m}$ .

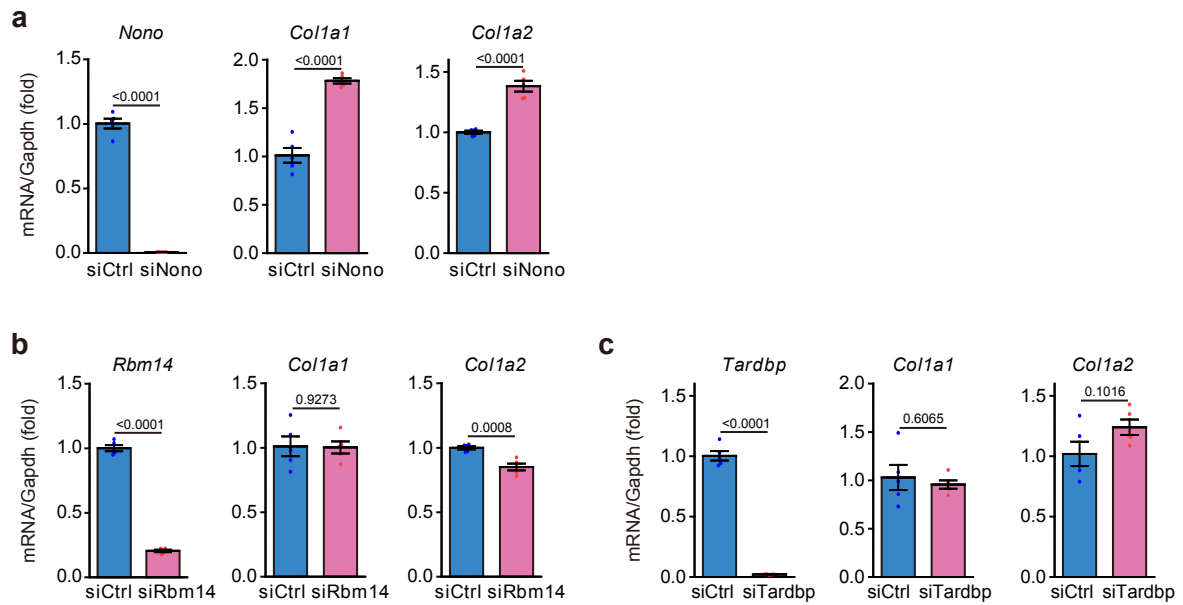

**Supplementary Fig. 9 The effect of paraspeckle proteins identified as VGLL3 interactors on collagen production by cardiac myofibroblasts.**

**a-c** mRNA levels of collagens in cardiac myofibroblasts transfected with siRNA targeting *Nono* (**a**), *Rbm14* (**b**) or *Tardbp* (**c**) ( $n = 5$  each). The experiments were performed at least three times. Data are shown as the mean  $\pm$  SEM. *P*-values were determined using the two-sided Student's *t*-test.

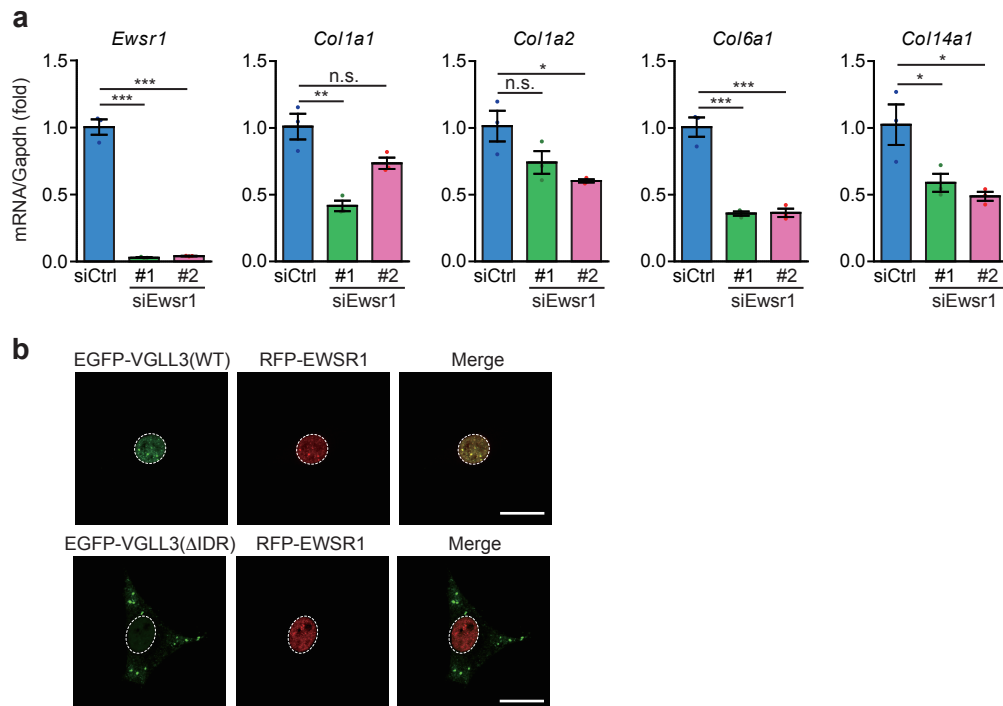

**Supplementary Fig. 10 EWSR1 promotes collagen expression.**

**a** mRNA levels of *Ewsr1* and collagens in cardiac myofibroblasts transfected with different siRNAs targeting *Ewsr1* (siEwsr1 #1 and #2) ( $n = 3$  each). Data are shown as the mean  $\pm$  SEM. **b** Images of live NIH3T3 cells transfected with EGFP-VGLL3 (WT) or ( $\Delta$ IDR) and RFP-EWSR1. The experiments were done three times.  $P$ -values were determined using one-way ANOVA followed by Tukey's range test in **a**,  $*P < 0.05$ ,  $**P < 0.01$ ,  $***P < 0.001$ . n.s.; not statistically significant. White dashed circles mark the nucleus in **b**. Scale bars in **b** = 20  $\mu$ m.

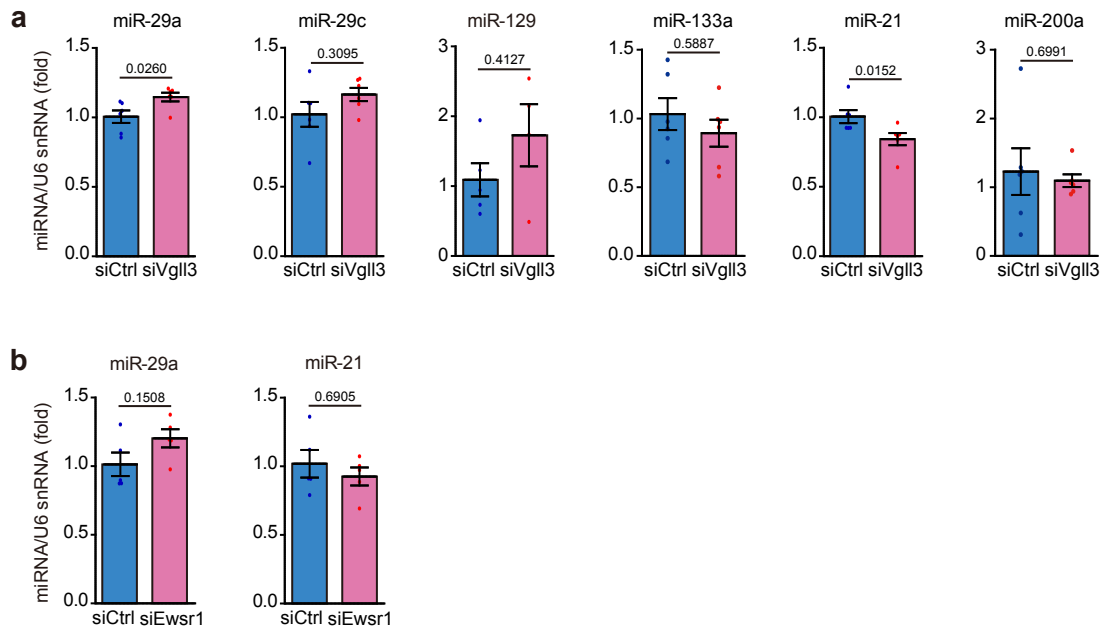

**Supplementary Fig. 11 Expression levels of major miRNAs involved in fibrotic responses in cardiac myofibroblasts transfected with siRNA against *Vgll3* or *Ewsr1*.**

**a** The expression level of miR-29a ( $n = 6$  each), miR-29c ( $n = 6$  each), miR-129 (siCtrl:  $n = 5$ , siVgll3:  $n = 4$ ), miR-133a ( $n = 6$  each), miR-21 ( $n = 6$  each) and miR-200a ( $n = 6$  each) in cardiac myofibroblasts transfected with siRNA targeting *Vgll3*. **b** The expression level of miR-29a and miR-21 in cardiac myofibroblasts transfected with siRNA targeting *Ewsr1* ( $n = 5$  each). Data are shown as the mean  $\pm$  SEM.  $P$  value was determined using two-sided Mann-Whitney's  $U$  test.



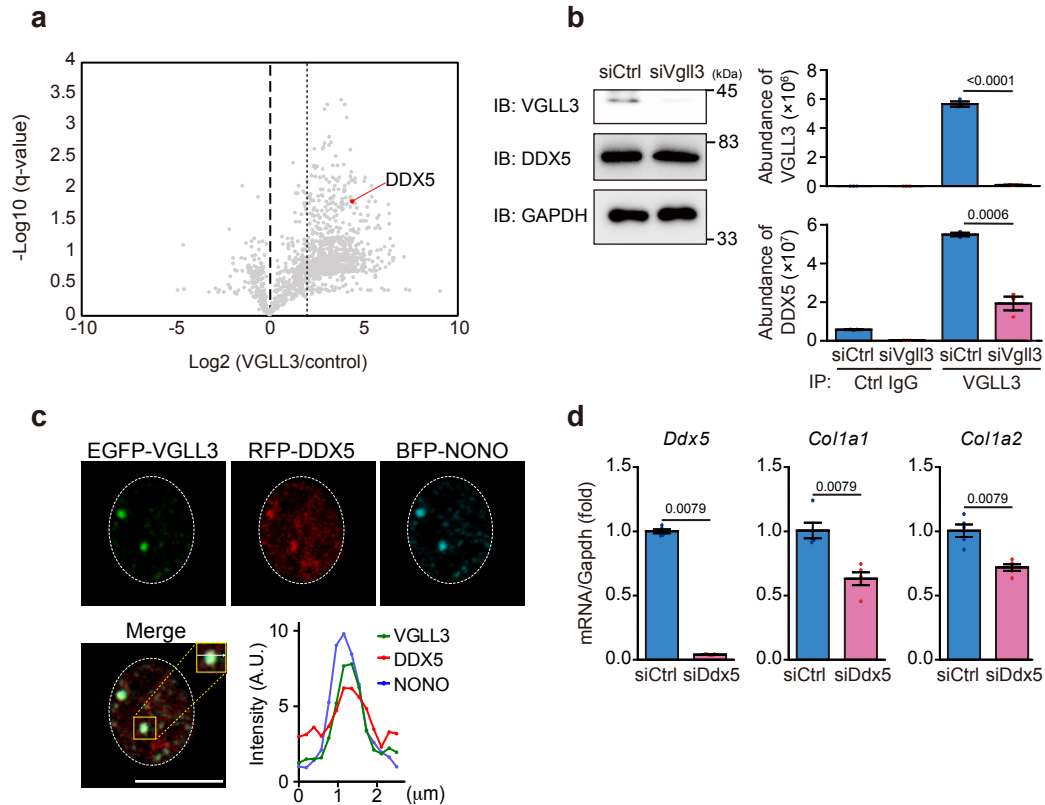

**Supplementary Fig. 12 DDX5 interacts with VGLL3 and promotes the expression of collagens in cardiac myfibroblasts.**

**a** DDX5 is indicated in volcano plot of Fig. 4a. **b** Endogenous interaction between VGLL3 and DDX5 in cardiac myfibroblasts analyzed by PRM mass spectrometry of immunoprecipitates with anti-VGLL3 antibody with three technical replicates. Western blot images of cell lysates used in the PRM analysis are shown in the left. **c** Images of live NIH3T3 cells transfected with EGFP-VGLL3, RFP-DDX5, and BFP-NONO. The graph represents line scans along the white line in the yellow dashed square in the inset on **c**. **d** mRNA levels of *Ddx5*, *Col1a1* and *Col1a2* in cardiac myfibroblasts transfected with siRNA targeting *Ddx5*. The mRNA levels were normalised to those of *Gadph* ( $n = 5$  each). Results are shown as fold changes relative to siCtrl data. Data are presented as the mean  $\pm$  SEM.  $P$ -values were determined using two-sided Student's  $t$ -test in **b** and two-sided Mann–Whitney's  $U$  test in **d**. Scale bars in **c** = 10  $\mu\text{m}$ .

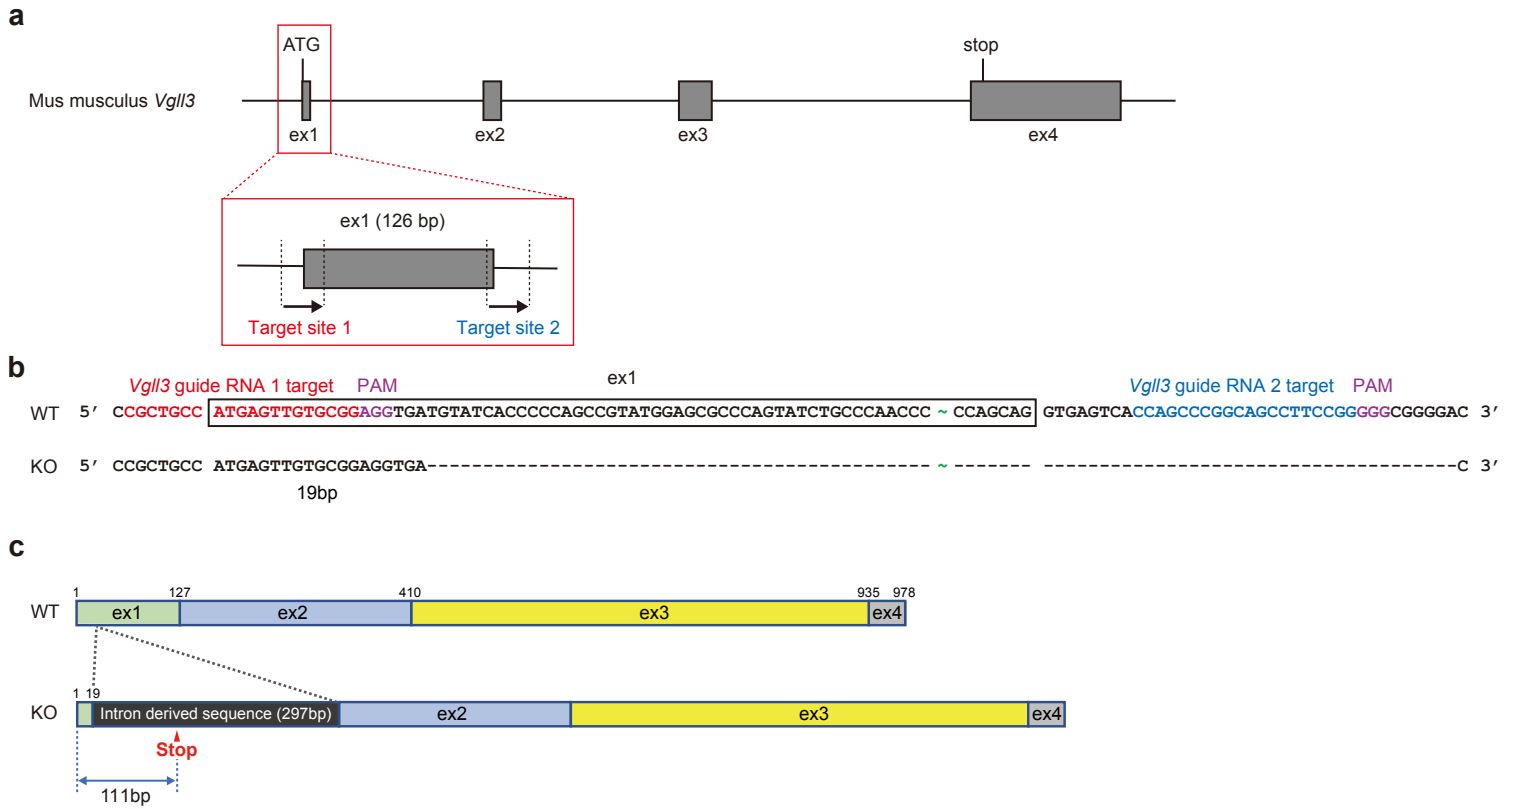

**Supplementary Fig. 13 Generation of *Vgll3* KO mice.**

**a** Schematic image of genomic target sites in the *Vgll3* gene. **b** Genomic sequences of the *Vgll3* locus in WT and *Vgll3* KO mice. Coloured characters indicate target sites 1 (red) and 2 (blue). Protospacer adjacent motifs (PAM) are labelled in purple. The green tilde (~) in ex1 indicates omission of the genome sequence. Figure dashes (-) indicate the missing genomic sequence in *Vgll3* KO mice. **c** A stop codon was newly generated in the *Vgll3* mRNA in *Vgll3* KO mice. In *Vgll3* mRNA from *Vgll3* KO mice, only the 1st–19th bases of exon 1 were included, and the intron-derived sequence was inserted between exon 1 and exon 2. Exon 1 deletion and intron insertion generated a stop codon (TAG) at the 37th amino acid, resulting in the incompletely functional VGLL3.

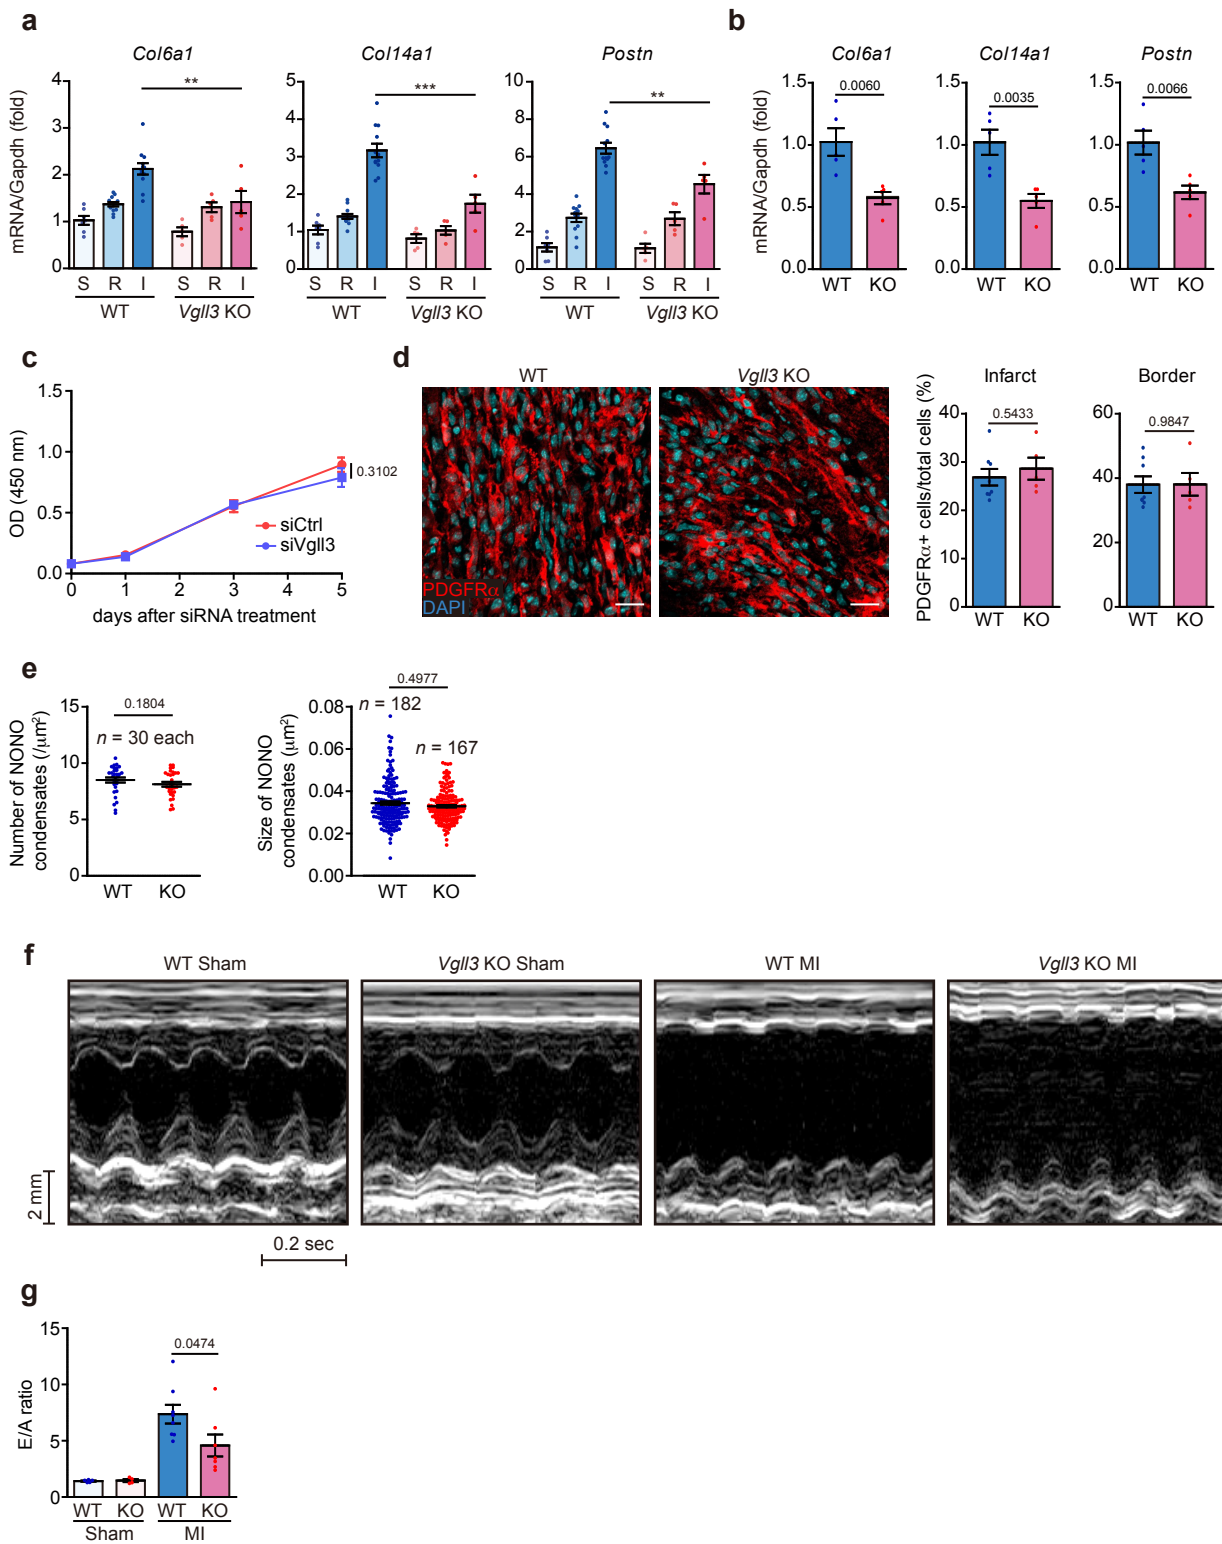

**Supplementary Fig. 14 Cardiac conditions of WT and *Vgll3* KO mice after MI.**

**a** mRNA levels of fibrosis-related genes in sham (S)-operated ventricles, and in the remote (R) and infarcted (I) areas of WT and *Vgll3* KO mouse hearts, 3 days after MI (WT: S/R/I,  $n = 7/12/12$ ; KO: S/R/I,  $n = 5/5/5$ ). **b** mRNA levels of fibrosis-related genes in cardiac myofibroblasts isolated from WT and *Vgll3* KO mouse hearts, 3 days after MI (WT:  $n = 5$ ; KO:  $n = 5$ ). **c** Cell proliferation of cardiac myofibroblasts transfected with siRNA targeting *Vgll3* was determined using WST-8 assay ( $n = 5$ ). **d** Immunostaining images of PDGFR $\alpha$  fibroblasts in heart sections of WT and *Vgll3* KO mice, 4 days after MI. The percentages of PDGFR $\alpha$ + fibroblasts in total cells in the infarcted or border area are shown in graph ( $n = 5$ ). **e** The number ( $n = 30$  cells, left) or the size ( $n > 150$  condensates, right) of NONO condensates in cardiac myofibroblasts isolated from WT and *Vgll3* KO mouse hearts, 3 days after MI. **f** Representative M-mode images of WT and *Vgll3* KO mice, 28 days after MI or sham operation. **g** E/A ratio of WT and *Vgll3* KO mice, 28 days after MI or sham operation (WT: Sham/MI,  $n = 5/8$ ; KO: Sham/MI,  $n = 4/7$ ). Data in **a-e**, and **g** are presented as the mean  $\pm$  SEM.  $P$ -values were determined using one-way ANOVA followed by Tukey's range test in **a**, two-sided Student's  $t$ -test in **b-d**, and **g**, and two-sided Mann-Whitney's  $U$  test in **e**,  $**P < 0.01$ ,  $***P < 0.001$ . Scale bar in **d** = 20  $\mu\text{m}$ .

**Supplementary Table 1. Echocardiographic measurements and organ weights of WT and Vgll3 KO mice on 28 days after MI.**

HW; heart weight, BW; body weight. LW; lung weight, IVSTd; interventricular septal thickness diastolic, LVIDd; left ventricular inner diameter diastolic, LVPWd; left ventricular posterior wall diameter diastolic, LVIDs; left ventricular inner diameter systolic, %EF; percent ejection fraction, %FS; percent fractional shortening.

\$ WT-MI vs WT-sham, # KO-MI vs WT-MI, followed by two-sided Mann-Whitney's U test.

| parameters   | WT-sham (n=8) | WT-MI (n=18)                        | Vgll3 KO-sham (n=5) | Vgll3 KO-MI (n=7)                  |
|--------------|---------------|-------------------------------------|---------------------|------------------------------------|
| HW/BW (mg/g) | 3.91±0.14     | 5.33±0.27 <sup>\$</sup> (P=0.0004)  | 4.09±0.14           | 4.85±0.24                          |
| LW/BW (mg/g) | 3.73±0.16     | 7.24±0.81 <sup>\$</sup> (P=0.0003)  | 3.62±0.08           | 5.48±0.58                          |
| IVSTd (mm)   | 0.99±0.05     | 0.65±0.22 <sup>\$</sup> (P=0.0003)  | 0.97±0.06           | 0.45±0.01                          |
| LVPWd (mm)   | 0.87±0.07     | 1.35±0.04 <sup>\$</sup> (P=0.0002)  | 0.89±0.10           | 1.29±0.07                          |
| LVIDs (mm)   | 1.89±0.15     | 4.73±0.17 <sup>\$</sup> (P<0.0001)  | 2.02±0.14           | 4.30±0.29                          |
| LVIDd (mm)   | 3.09±0.17     | 5.59±0.17 <sup>\$</sup> (P<0.0001)  | 3.26±0.12           | 5.53±0.29                          |
| %EF          | 70.84±2.59    | 32.39±1.49 <sup>\$</sup> (P<0.0001) | 69.30±3.63          | 44.78±2.85 <sup>#</sup> (P=0.0022) |
| %FS          | 39.22±1.90    | 15.59±0.79 <sup>\$</sup> (P<0.0001) | 38.20±2.74          | 22.59±1.64 <sup>#</sup> (P=0.0012) |



**Supplementary Table 2. The list of siRNAs used in this study**

| siRNA      | Company | Assay ID | Species     |
|------------|---------|----------|-------------|
| siVgll3 #1 | ambion  | s91840   | mouse       |
| siVgll3 #2 | ambion  | s91839   | mouse       |
| siVGLL3    | ambion  | s52380   | human       |
| siNeat1    | ambion  | n256283  | mouse       |
| siEwsr1 #1 | ambion  | s65750   | mouse       |
| siEwsr1 #2 | ambion  | s125017  | mouse       |
| siDdx5     | ambion  | s64910   | mouse       |
| siVgll4    | ambion  | s107155  | mouse       |
| siTead1    | ambion  | s74928   | mouse       |
| siNono     | ambion  | s79235   | mouse       |
| siRbm14    | ambion  | s80246   | mouse       |
| siTardbp   | ambion  | s106687  | mouse       |
| siCtrl     | ambion  | 4390844  | mouse/human |

### Supplementary Table 3. List of plasmids used in this study

| Transient expression               |        |                         |                |
|------------------------------------|--------|-------------------------|----------------|
| CDS                                | Vector | NCBI reference sequence |                |
| HA-V <sub>gII3</sub>               | pcDNA3 | NM_028572.2             | NP_082848.1    |
| EGFP-V <sub>gII3</sub>             | pcDNA3 | CodonOptimization       | NP_082848.1    |
| EGFP-V <sub>gII3</sub> ΔIDR mutant | pcDNA3 | CodonOptimization       |                |
| EGFP-V <sub>gII3</sub> GGS mutant  | pcDNA3 | CodonOptimization       |                |
| FLAG-V <sub>gII1</sub>             | pcDNA3 | NM_001313763.1          | NP_001300692.1 |
| FLAG-V <sub>gII2</sub>             | pcDNA3 | NM_153786.2             | NP_722481.1    |
| FLAG-E <sub>wsr1</sub>             | pcDNA3 | NM_001283061.2          | NP_001269990.1 |
| RFP-E <sub>wsr1</sub>              | pcDNA3 | NM_001283061.2          | NP_001269990.1 |
| BFP-NONO                           | pcDNA3 | NM_023144.2             | NP_075633.2    |

  

| Retrovirus production              |           |                         |             |
|------------------------------------|-----------|-------------------------|-------------|
| CDS                                | Vector    | NCBI reference sequence |             |
| FLAG-V <sub>gII3</sub>             | pMXs-puro | NM_028572.2             | NP_082848.1 |
| FLAG-V <sub>gII3</sub>             | pMXs-puro | CodonOptimization       | NP_082848.1 |
| FLAG-V <sub>gII3</sub> ΔIDR mutant | pMXs-puro | CodonOptimization       |             |
| FLAG-V <sub>gII3</sub> GGS mutant  | pMXs-puro | CodonOptimization       |             |
| EGFP-V <sub>gII3</sub>             | pMXs-puro | CodonOptimization       | NP_082848.1 |
| HA-V <sub>gII3</sub>               | pMXs-puro | NM_028572.2             | NP_082848.1 |
| HA-V <sub>gII4</sub>               | pMXs-puro | NM_177683.3             | NP_808351.1 |

**Supplementary Table 4. List of antibodies and reagents used in this study**

| Western Blot                                      |                        |                            |                  |              |
|---------------------------------------------------|------------------------|----------------------------|------------------|--------------|
| Antibody                                          | Company name           | Dilution                   | Catalogue number | Clone number |
| anti-VGLL3                                        | Cosmobio               | 1:4000                     | custom-made      |              |
| anti-EWSR1                                        | Protein tech           | 1:4000                     | Cat# 55191-1-AP  |              |
| anti- $\alpha$ SMA                                | Thermo                 | 1:5000                     | Cat# MS-113-P    | 1A4          |
| anti-Periostin                                    | R&D systems            | 1:3000                     | Cat# AF2955      |              |
| anti-Collagen I                                   | Abcam                  | 1:10000                    | Cat# ab34710     |              |
| anti-Collagen 1a1                                 | CST                    | 1:5000                     | Cat# 72026       | E8F4L        |
| anti-Rbm14                                        | MBL                    | 1:4000                     | Cat# RN069PW     |              |
| anti-TDP-43                                       | MBL                    | 1:4000                     | Cat# RN107PW     |              |
| anti-DDX5                                         | BETHYL                 | 1:3000                     | Cat# A300-523A   |              |
| anti-HA-HRP                                       | Roche                  | 1:10000                    | Cat# 12013819001 | 3F10         |
| anti-FLAG-HRP                                     | Sigma                  | 1:20000                    | Cat# A8592       | M2           |
| anti-GAPDH                                        | Santa Cruz             | 1:50000                    | Cat# sc-32233    | 6C5          |
| anti-mouse IgG-HRP                                | Santa Cruz             | 1:10000                    | Cat# sc-2005     |              |
| anti-Rabbit IgG-HRP                               | Santa Cruz             | 1:10000                    | Cat# sc-2004     |              |
| anti-goat IgG-HRP                                 | Santa Cruz             | 1:10000                    | Cat# sc-2768     |              |
| anti-rabbit IgG, HRP-linked Antibody              | CST                    | 1:2000                     | Cat# 7074        |              |
| Immunocytochemistry                               |                        |                            |                  |              |
| Antibody                                          | Company name           | Dilution                   | Catalogue number | Clone number |
| anti-DYKDDDDK                                     | Novus                  | 1:200                      | Cat# NBP1-06712  | L5           |
| anti-VGLL3                                        | Abcam                  | 1:200                      | Cat# ab83555     |              |
| anti-YAP1                                         | Sigma                  | 1:200                      | Cat# WH0010413M1 | 2F12         |
| anti-NONO                                         | MBL                    | 1:200                      | Cat# RN013MW     |              |
| anti-SFPQ                                         | Proteintech            | 1:200                      | Cat# 15585-1-AP  |              |
| AlexaFluor®488-conjugated donkey anti-rabbit IgG  | Invitrogen             | 1:200                      | Cat# A21206      |              |
| AlexaFluor®594-conjugated goat anti-rabbit IgG    | Invitrogen             | 1:200                      | Cat# A11037      |              |
| AlexaFluor®488-conjugated donkey anti-rat IgG     | Invitrogen             | 1:200                      | Cat# A11006      |              |
| AlexaFluor®546-conjugated goat anti-mouse IgG     | Invitrogen             | 1:200                      | Cat# A11003      |              |
| Regent                                            |                        |                            |                  |              |
| Regent                                            | Company name           | Catalogue number           |                  |              |
| CellTrace Far Red                                 | Thermo                 | Cat# C34572                |                  |              |
| DAPI                                              | Dojindo                | Cat# 340-07971             |                  |              |
| Latrunculin A                                     | Abcam                  | Cat# ab144290              |                  |              |
| Y27632                                            | Wako                   | Cat# 257-0051              |                  |              |
| BTT-3033                                          | Tocris                 | Cat# 4724                  |                  |              |
| VS-4718                                           | Chemie Tek             | Cat# CT-VS4718             |                  |              |
| Blebbistatin                                      | Wako                   | Cat# 021-17041             |                  |              |
| Cell Permeable C3 Transferase                     | Cytoskeleton           | Cat# CT04-A                |                  |              |
| 1,6-Hexanediol                                    | Sigma                  | Cat# 240117                |                  |              |
| 2,5-Hexanediol                                    | Sigma                  | Cat# H11904                |                  |              |
| Immunohistochemistry                              |                        |                            |                  |              |
| Antibody                                          | Company name           | Dilution                   | Catalogue number | Clone number |
| anti- $\alpha$ SMA                                | Abcam                  | 1:200                      | Cat# ab5694      |              |
| anti-CD45                                         | BioLegend              | 1:200                      | Cat# 103101      | 30-F11       |
| anti-alpha Actinin                                | Abcam                  | 1:200                      | Cat# ab18061     |              |
| anti-PDGFR $\alpha$                               | R&D systems            | 1:200                      | Cat# AF1062      |              |
| anti-Collagen 1a1                                 | CST                    | 1:200                      | Cat# 72026       | E8F4L        |
| anti-human $\alpha$ SMA                           | Abcam                  | 1:200                      | Cat# ab124964    |              |
| AlexaFluor®488-conjugated donkey anti-rabbit IgG  | Invitrogen             | 1:200                      | Cat# A21206      |              |
| AlexaFluor®647-conjugated donkey anti-rabbit IgG  | Jackson ImmunoResearch | 1:200                      | Cat# 711-606-152 |              |
| AlexaFluor®488-conjugated donkey anti-rat IgG     | Invitrogen             | 1:200                      | Cat# A11006      |              |
| AlexaFluor®488-conjugated donkey anti-mouse IgG   | Invitrogen             | 1:200                      | Cat# A11001      |              |
| AlexaFluor®594-conjugated rabbit anti-goat IgG    | Invitrogen             | 1:200                      | Cat# A 21223     |              |
| RNAscope                                          |                        |                            |                  |              |
| Gene                                              | Species                | Company name               | Catalogue number |              |
| Negative probe                                    | E.coli                 | ACD                        | Cat# 310034      |              |
| Vgll3                                             | mouse                  | ACD                        | Cat# 517821      |              |
| Postn                                             | mouse                  | ACD                        | Cat# 418581-C2   |              |
| VGLL3                                             | human                  | ACD                        | Cat# 515931      |              |
| TSA Plus Cyanine 3                                |                        | PerkinElmer                | Cat# NEL753001KT |              |
| TSA Plus Cyanine 5                                |                        | PerkinElmer                | Cat# NEL745001KT |              |
| Stellaris RNA FISH                                |                        |                            |                  |              |
| Gene                                              | Species                | Company name               | Catalogue number |              |
| Neat1                                             | mouse                  | LGC Biosearch Technologies | SMF-3010-1       |              |
| Flow cytometry                                    |                        |                            |                  |              |
| Antibody                                          | Company name           | Dilution                   | Catalogue number | Clone number |
| PE-conjugated Rat anti-CD45 antibody              | Biolegend              | 1:200                      | Cat# 103105      | 30-F11       |
| FITC-conjugated Mouse anti- $\alpha$ SMA antibody | Sigma                  | 1:200                      | Cat# F3777       | 1A4          |
| Immunoprecipitation                               |                        |                            |                  |              |
| Antibody and Beads                                | Company name           | amount                     | Catalogue number | Clone number |
| nomal Rabbit IgG (0.4 mg/mL)                      | Santa Cruz             | 1 $\mu$ g/sample           | Cat# sc-2027     |              |
| anti-VGLL3 antibody (custom made) (0.21 mg/mL)    | cosmo bio              | 1 $\mu$ g/sample           |                  |              |
| SureBeads Protein G                               | BioRad                 | 5 $\mu$ L/sample           | Cat#1614023      |              |
| Pierce anti-HA Magnetic Beads                     | Thermo                 | 20 $\mu$ L/sample          | Cat# 88837       |              |
| anti-FLAG(DYKDDDDK) tag Antibody Magnetic Beads   | Wako                   | 20 $\mu$ L/sample          | Cat# 017-25151   |              |

## Supplementary Table 5. List of qRT-PCR primer and probe sets used in this study

| Gene Name     | Species     | Company name       | Catalogue number        | Forward                           | Reverse                           | Probe                                  |
|---------------|-------------|--------------------|-------------------------|-----------------------------------|-----------------------------------|----------------------------------------|
| Vgll3         | mouse       | Sigma-Aldrich      | Custom                  | 5'-TGGCCCTACAGCCCTGCTATCA-3'      | 5'-CTCTCTCTCTCTCTCTCTCTCTTG-3'    | 5'-CTTGTGTATACCGGTAACCTTGTGCTGGC-3'    |
| Gapdh         | mouse       | Sigma-Aldrich      | Custom                  | 5'-CGTCCCGTAGACAAAATGGTGA-3'      | 5'-CCACTTTGGCCACTGTGCAATATGG-3'   | 5'-CCAAATACGGGCCAAATTCGGTTTACACCGCA-3' |
| Collagen 1a1  | mouse       | Sigma-Aldrich      | Custom                  | 5'-CCCCAAAAGGTTCTCTCTGTGAAG-3'    | 5'-CGGTTTTGGCCATCAGGACCA-3'       | 5'-TGTGTCCAAAGGGGTCTCACTGGCAGTTC-3'    |
| Collagen 1a2  | mouse       | Sigma-Aldrich      | Custom                  | 5'-CAAGCAATGCTGTGTTAGGAAAG-3'     | 5'-GCTAGGTTGCCAATTTCTTGG-3'       | 5'-CCCTTCAAGTTGATTCAAAACCTGAGCTGCC-3'  |
| Collagen 3a1  | mouse       | Sigma-Aldrich      | Custom                  | 5'-AAAGCCCTGATGTGTTCTGGAAG-3'     | 5'-CTTGTGAGCCCTTGGTATGGAATCC-3'   | 5'-ACCAGTATTTTCCACTCTTGTAGTTGGG-3'     |
| Collagen 6a1  | mouse       | Sigma-Aldrich      | Custom                  | 5'-TTGGCCCTGATTTACGGATG-3'        | 5'-TTGATTTCCCAAGAAACTACTCTGA-3'   | 5'-ACACTCAAGGGGACACGACCACTCTCA-3'      |
| Collagen 14a1 | mouse       | Sigma-Aldrich      | Custom                  | 5'-ATGGGGCCAGTAAAGACAGATGC-3'     | 5'-GCCAAGGACGAGGACCCGTGA-3'       | 5'-CAGGACTTTTCAATCCCGACGACGAGAA-3'     |
| Perostin      | mouse       | Sigma-Aldrich      | Custom                  | 5'-ACTGTCAATGACGAAAGATCCAA-3'     | 5'-CAGGAACTCACTATATGATTTTGTG-3'   | 5'-TGGCTCTCCGTGGATGATCACTTCTTCC-3'     |
| Neat1         | mouse       | Sigma-Aldrich      | Custom                  | 5'-TGGACCTGTCTACCTTTGGCC-3'       | 5'-TGACAAAGCTGCTCAGACCAAG-3'      | 5'-CTTCCATGATGAGAGTGCATAGGGCTT-3'      |
| Ewsr1         | mouse       | Sigma-Aldrich      | Custom                  | 5'-CTACCCCAATGCAAGCAATCA-3'       | 5'-ACTGCTCTGATGCTGTAAGTATG-3'     | 5'-CGCACTCTCATTTATCTCTTACCAAGCTA-3'    |
| Cd68          | mouse       | Sigma-Aldrich      | Custom                  | 5'-CCGCTTATAGCCCAAGGAAACA-3'      | 5'-TTCTGTGGCTGTAGGTTGATC-3'       | 5'-AAAAGGCCGTTAATCTCTGCAATCTT-3'       |
| Tnf           | mouse       | Sigma-Aldrich      | Custom                  | 5'-GTCTCAGCCCTTCTTCATTTCTG-3'     | 5'-GAGGGCCATTTGGGAAACTTCTCA-3'    | 5'-AGGGGGCCACCAAGCTTCTGTGTAC-3'        |
| Vgll1         | mouse       | Sigma-Aldrich      | Custom                  | 5'-AAAGAGGGCCCAAAAATGCAAG-3'      | 5'-TCTATCCGGTGTGGCTGGTGT-3'       | 5'-TCCGTTTHTTATACCCCGTTTGTGAGGG-3'     |
| Vgll2         | mouse       | Sigma-Aldrich      | Custom                  | 5'-GTGCCCCCGGACCCCTTATTTTC-3'     | 5'-GCTGGGGGTTGGGTTGGAAAA-3'       | 5'-CGCCCTAACCTCCCTAACCAAGAAACTAGC-3'   |
| Vgll4         | mouse       | Sigma-Aldrich      | Custom                  | 5'-GTGAGGCTTCATGTGTGGC-3'         | 5'-CAGCTGCTTCTTGTAGTCAAGG-3'      | 5'-CCTGTAGGCAATCTCTCCCGACGCTCAT-3'     |
| Acta2         | mouse       | Sigma-Aldrich      | Custom                  | 5'-CACCATGAGATCAAGATCATTTGCC-3'   | 5'-GATAGACAGGCAAGGACAGGA-3'       | 5'-AGCCACCGGATCCAGACAGAGTACTGGG-3'     |
| Oct4          | mouse       | Sigma-Aldrich      | Custom                  | 5'-TGAAGGTGGAGTCTGGAGACC-3'       | 5'-GAAACCATACTCGAAGCACATCC-3'     | 5'-TGAAGTGGCCGAAAGCCCTCCCTACA-3'       |
| Thy1          | mouse       | Sigma-Aldrich      | Custom                  | 5'-ACCAGCCCTATATCAAGGTTCTTA-3'    | 5'-CACACTTGACCCAGCTTGTCTTA-3'     | 5'-AACTTCAACCAAGGATGAGAGGGGACT-3'      |
| Tg21          | mouse       | Sigma-Aldrich      | Custom                  | 5'-ACGACAAGTACGAGAAAGGTTA-3'      | 5'-CCTTCAAGTCAATTTCTGTGTTG-3'     | 5'-CCACCATAAAGGGCCACGTAAGGTTTA-3'      |
| Islr          | mouse       | Sigma-Aldrich      | Custom                  | 5'-GCCATCTCAAGAGTCTGGACC-3'       | 5'-GGCGCTGAGGCTGTGTAAA-3'         | 5'-AGCCACAACCTCTCTGTGATTTGGCCT-3'      |
| Nf5e          | mouse       | Sigma-Aldrich      | Custom                  | 5'-GATGGACAACACTTATTCGCTCAGAAA-3' | 5'-GGAAGGTTGGATTTCTCTGTGTA-3'     | 5'-TCTCTCCACGACAGATGTCACACCTG-3'       |
| Vgll3 3'UTR   | mouse       | Sigma-Aldrich      | Custom                  | 5'-CAGCAGATCATATATGGCAGATG-3'     | 5'-TCTCCAGAAAAAGGTTCAAATCGAAAA-3' | 5'-TGGCCTTATATGTTCTTCTTCACTCCACA-3'    |
| Cyp7a1        | mouse       | Applied Biosystems | Assay ID: Mm00484150_m1 |                                   |                                   |                                        |
| Tead1         | mouse       | Sigma-Aldrich      | Custom                  | 5'-CAGAAGAGACCCAGACTCGTACA-3'     | 5'-CAAGCCACCCTTTCTTTTCAGGAAA-3'   | 5'-CATGCCAAACCATTCTTACAGTGAACCCGTT-3'  |
| Noto          | mouse       | Sigma-Aldrich      | Custom                  | 5'-GGGAAAGGCGCATTTGTGAAGTTCTC-3'  | 5'-CACAGGCGCCGAGGAAATGTAGTC-3'    | 5'-AGGAGGCTTCACTGACATCTGTCAGAGC-3'     |
| Rbn14         | mouse       | Sigma-Aldrich      | Custom                  | 5'-GCCCTGAAACACTTGGGAAGAT-3'      | 5'-ATGTGAACCAAAAGCGGTAATCTTT-3'   | 5'-ACATGCAAGCCGATACATTTGCCACGA-3'      |
| Tarbp         | mouse       | Sigma-Aldrich      | Custom                  | 5'-TGGGGGATGTGTGTGACTGTA-3'       | 5'-CGTCCAACAAAACCTTTCTGGC-3'      | 5'-ACTTCCCAACTTAAGCAAAAGCCGACGA-3'     |
| Ddx5          | mouse       | Sigma-Aldrich      | Custom                  | 5'-CGAAAGCAGAGAGTTCAAGTGC-3'      | 5'-CACCCTTTTTCGCTGCAAGAG-3'       | 5'-CGTCCCTTACGCTCTCTTACCCCTGG-3'       |
| Acta2         | human       | Sigma-Aldrich      | Custom                  | 5'-GATCTGTACTGAGGTTGGC-3'         | 5'-CAGAGGTACATAACACAGATTTCTCC-3'  | 5'-ATTCTTGTATAGTACTGCTGAGGTAGAGA-3'    |
| Collagen 1a1  | human       | Sigma-Aldrich      | Custom                  | 5'-ACTGTGTGACCTGTGGTGTGA-3'       | 5'-GCCGATACTGTGAACTGG-3'          | 5'-CTCTTGGCCAAACCAAGACATGCTCTTGG-3'    |
| Collagen 1a2  | human       | Sigma-Aldrich      | Custom                  | 5'-CTGGCTTAAAGGGACACAAATGG-3'     | 5'-CCAGCAGGACCCACGGAG-3'          | 5'-CAAGGTTCTGCTGTGATTCGGTGTACG-3'      |
| Vgll3         | human       | Sigma-Aldrich      | Custom                  | 5'-ACCACCCTCATGCCCCACA-3'         | 5'-CACACTGGGGAGCCAGGAATC-3'       | 5'-CCACCGCCACCATCATAACCATACCA-3'       |
| GAPDH         | human       | Sigma-Aldrich      | Custom                  | 5'-TGGGCTACTGAGACCCAGC-3'         | 5'-GCCAAAATTCGTTTCTACTAACGAGG-3'  | 5'-TTCAACAAGGAGACCCACTCTCCACG-3'       |
| 18S rRNA      | mouse/human | Sigma-Aldrich      | Custom                  | 5'-GGGTCAATAGCCTTGCCTTGAATTAAG-3' | 5'-TCCGAGGGGCTCACTAAACC-3'        | 5'-TACACACAGCCCGCTCCCTACTACCG-3'       |
| miR-21        | mouse/human | Applied Biosystems | Assay ID: 000397        |                                   |                                   |                                        |
| miR-29a       | mouse/human | Applied Biosystems | Assay ID: 002112        |                                   |                                   |                                        |
| miR-29b       | mouse/human | Applied Biosystems | Assay ID: 000413        |                                   |                                   |                                        |
| miR-29c       | mouse/human | Applied Biosystems | Assay ID: 000587        |                                   |                                   |                                        |
| miR-129       | mouse/human | Applied Biosystems | Assay ID: 000590        |                                   |                                   |                                        |
| miR-133a      | mouse/human | Applied Biosystems | Assay ID: 002246        |                                   |                                   |                                        |
| miR-200a      | mouse/human | Applied Biosystems | Assay ID: 000502        |                                   |                                   |                                        |
| U6 snRNA      | mouse/human | Applied Biosystems | Assay ID: 001973        |                                   |                                   |                                        |



## Supplementary Table 6. List of primers used in this study

PCR

| Gene Name | Species | Company name | Forward                                  | Reverse                               |
|-----------|---------|--------------|------------------------------------------|---------------------------------------|
| Vgll1     | mouse   | eurofins     | 5'-CTCTTCTTGGACAAATTGGACACAGCCAGGCAGC-3' | 5'-CTTTGGAGATGGGCTTCTTTCATCATCAAG-3'  |
| Vgll2     | mouse   | eurofins     | 5'-CAAAGCACACAGAAGGCTCTGGACCCCTGGAG-3'   | 5'-CTGCATTCCTCCTCCCTTACCTGAGGTCC-3'   |
| Vgll3     | mouse   | eurofins     | 5'-GACATTTGGGTCAGTAGTGGATGAACAACCTTC-3'  | 5'-GACTGTAGTCAGATCTGTCTTGGTGAATGTC-3' |
| Vgll4     | mouse   | eurofins     | 5'-GAATAAGACTGTCAACGGAGACTGCCGACAG-3'    | 5'-CAGGAGACCACAGAGGGGAGTGAATATGG-3'   |

# Supplementary Figure 5

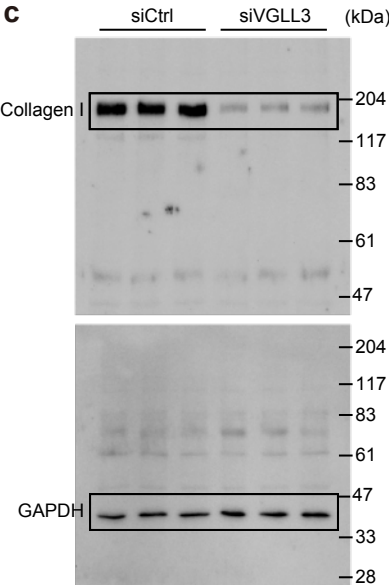

## Supplementary Figure 12

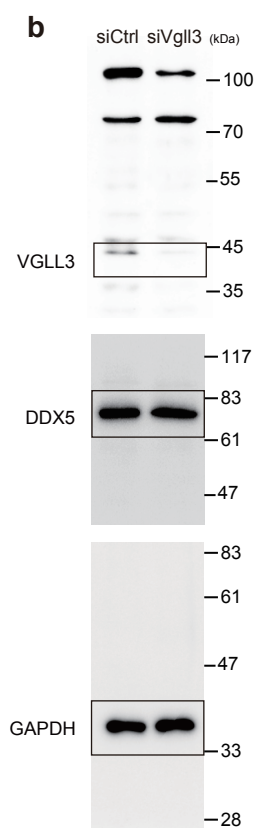

Supplement: 41467_2023_36189_MOESM1_ESM.pdf [file 41467_2023_36189_MOESM1_ESM.pdf]
